# Supplementary material for: Intersystem crossing in a dibenzofuran-based room temperature phosphorescent luminophore investigated by non-adiabatic dynamics
Source: Royal Society of Chemistry journal article supplement (doi:10.1039/d4cp02474e), 2024-01-01
Supplement: d4cp02474e1.pdf [file d4cp02474e1.pdf]

Electronic Supplementary Information for

# Intersystem Crossing in a Dibenzofuran-Based Room Temperature Phosphorescent Luminophore Investigated by Non-Adiabatic Dynamics

*Pelin Ulukan,<sup>1</sup> Elise Lognon,<sup>2</sup> Saron Catak,<sup>1</sup> and Antonio Monari<sup>2,\*</sup>*

1) Bogazici University 34342 Bebek/Istanbul Turkey.

2) Université Paris Cité and CNRS, ITODYS, F-75006 Paris, France.

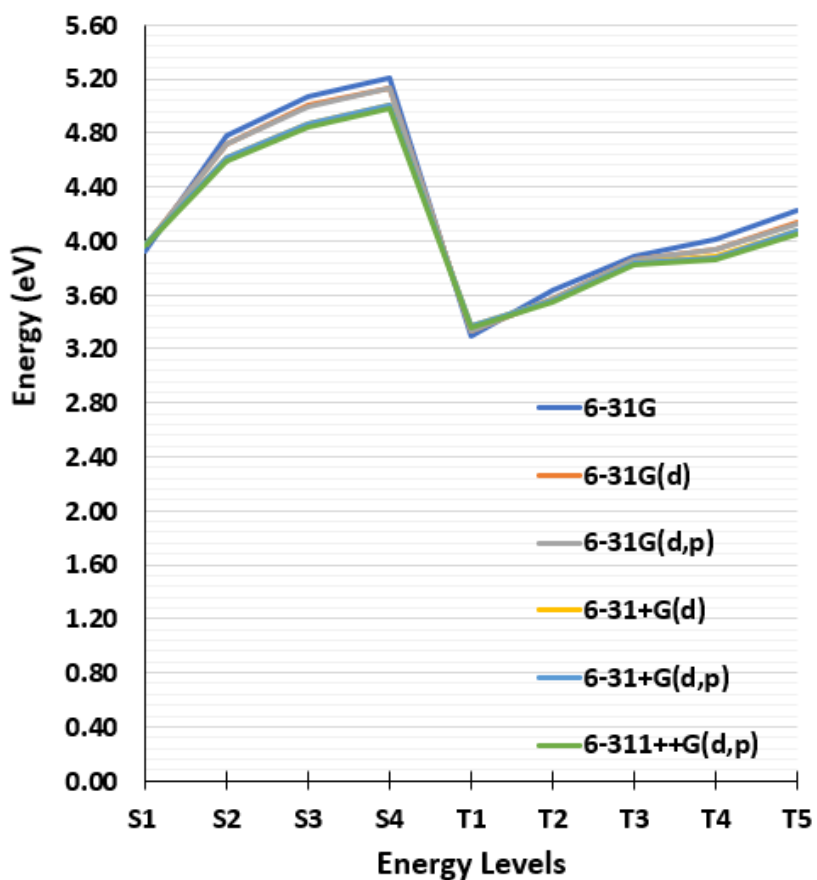

**Figure S1.** Vertical transitions energies calculated from the Franck-Condon geometry with different d exchange correlation functionals.

**Table S1** 3D representations of the  $S_0$ ,  $S_1$ ,  $T_1$ ,  $T_2$  and  $T_3$  equilibrium geometries of the RTP luminophore, as optimized at M06-2X/6-31+G(d,p) level of theory in toluene.

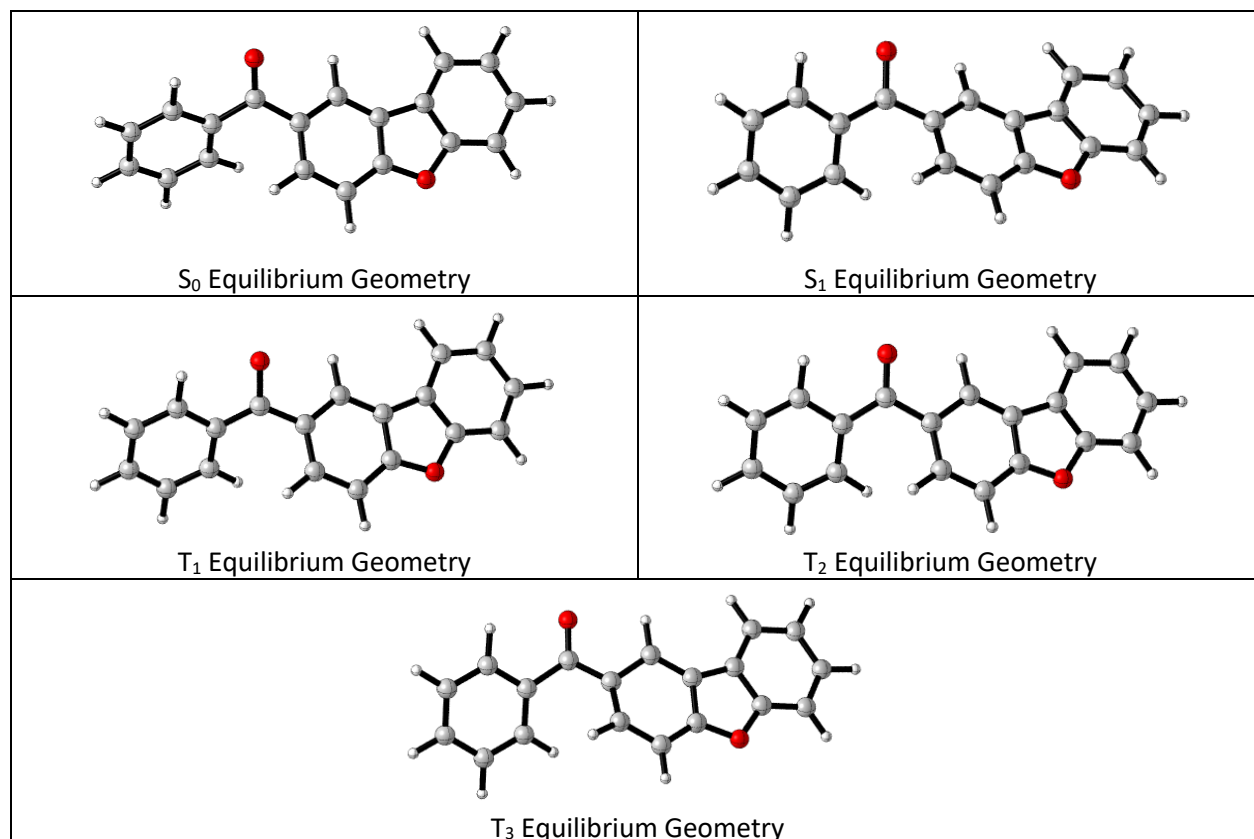

**Table S2** Evolution of the torsion angles around the carbonyl moiety for the FC,  $S_1$ ,  $T_1$ ,  $T_2$  and  $T_3$  equilibrium geometries, respectively.

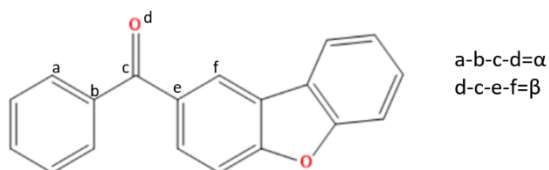

| Torsion Angle | FC / $S_1$ / $T_1$ / $T_2$ / $T_3$         |
|---------------|--------------------------------------------|
| $\alpha$      | -30.50 / -15.35 / -19.29 / -9.40 / -17.34  |
| $\beta$       | -26.60 / -34.85 / -26.60 / -23.12 / -15.26 |

**Table S3** Excited states energies calculated with different basis sets using the CAM-B3LYP and with different functionals using the 6-31G basis set in toluene at the  $S_0$  equilibrium geometry.

|                 | $S_1$ | $S_2$ | $S_3$ | $S_4$ | $T_1$ | $T_2$ | $T_3$ | $T_4$ | $T_5$ |
|-----------------|-------|-------|-------|-------|-------|-------|-------|-------|-------|
| <b>6-31G</b>    | 3.92  | 4.78  | 5.07  | 5.21  | 3.30  | 3.63  | 3.88  | 4.01  | 4.22  |
| <b>6-31G(d)</b> | 3.96  | 4.72  | 5.00  | 5.13  | 3.33  | 3.58  | 3.86  | 3.94  | 4.13  |

|                      |                      |                      |                      |                      |                      |                      |                      |                      |                      |
|----------------------|----------------------|----------------------|----------------------|----------------------|----------------------|----------------------|----------------------|----------------------|----------------------|
| <b>6-31G(d,p)</b>    | 3.96                 | 4.71                 | 4.99                 | 5.13                 | 3.33                 | 3.57                 | 3.85                 | 3.94                 | 4.13                 |
| <b>6-31+G(d)</b>     | 3.98                 | 4.62                 | 4.87                 | 5.01                 | 3.37                 | 3.56                 | 3.84                 | 3.88                 | 4.08                 |
| <b>6-31+G(d,p)</b>   | 3.98                 | 4.61                 | 4.87                 | 5.00                 | 3.37                 | 3.56                 | 3.84                 | 3.88                 | 4.07                 |
| <b>6-311++G(d,p)</b> | 3.97                 | 4.59                 | 4.84                 | 4.98                 | 3.35                 | 3.54                 | 3.82                 | 3.86                 | 4.05                 |
|                      | <b>S<sub>1</sub></b> | <b>S<sub>2</sub></b> | <b>S<sub>3</sub></b> | <b>S<sub>4</sub></b> | <b>T<sub>1</sub></b> | <b>T<sub>2</sub></b> | <b>T<sub>3</sub></b> | <b>T<sub>4</sub></b> | <b>T<sub>5</sub></b> |
| <b>M06-2X</b>        | 3.81                 | 4.66                 | 4.92                 | 5.04                 | 3.35                 | 3.85                 | 3.99                 | 4.17                 | 4.24                 |
| <b>PBE0</b>          | 3.79                 | 4.14                 | 4.34                 | 4.70                 | 3.19                 | 3.45                 | 3.64                 | 3.75                 | 3.79                 |
| <b>ωB97XD</b>        | 3.97                 | 4.66                 | 4.93                 | 5.05                 | 3.40                 | 3.64                 | 3.91                 | 3.96                 | 4.13                 |
| <b>CAM-B3LYP</b>     | 3.98                 | 4.61                 | 4.87                 | 5.00                 | 3.37                 | 3.56                 | 3.84                 | 3.88                 | 4.07                 |

**Table S4** Excited states energies calculated with different basis sets using the CAM-B3LYP functional and with different functionals using the 6-31G basis set in toluene at the S<sub>1</sub> equilibrium geometry.

|                      |                      |                      |                      |                      |                      |                      |                      |                      |                      |
|----------------------|----------------------|----------------------|----------------------|----------------------|----------------------|----------------------|----------------------|----------------------|----------------------|
|                      | <b>S<sub>1</sub></b> | <b>S<sub>2</sub></b> | <b>S<sub>3</sub></b> | <b>S<sub>4</sub></b> | <b>T<sub>1</sub></b> | <b>T<sub>2</sub></b> | <b>T<sub>3</sub></b> | <b>T<sub>4</sub></b> | <b>T<sub>5</sub></b> |
| <b>6-31G</b>         | 3.37                 | 4.63                 | 4.77                 | 5.01                 | 2.74                 | 3.32                 | 3.62                 | 3.91                 | 4.15                 |
| <b>6-31G(d)</b>      | 3.38                 | 4.56                 | 4.74                 | 4.97                 | 2.76                 | 3.33                 | 3.56                 | 3.83                 | 4.07                 |
| <b>6-31G(d,p)</b>    | 3.38                 | 4.56                 | 4.74                 | 4.97                 | 2.76                 | 3.33                 | 3.55                 | 3.83                 | 4.06                 |
| <b>6-31+G(d)</b>     | 3.42                 | 4.44                 | 4.62                 | 4.85                 | 2.83                 | 3.34                 | 3.52                 | 3.77                 | 4.00                 |
| <b>6-31+G(d,p)</b>   | 3.42                 | 4.44                 | 4.61                 | 4.85                 | 2.83                 | 3.33                 | 3.52                 | 3.76                 | 4.00                 |
| <b>6-311++G(d,p)</b> | 3.41                 | 4.41                 | 4.60                 | 4.83                 | 2.82                 | 3.33                 | 3.51                 | 3.74                 | 3.98                 |
|                      | <b>S<sub>1</sub></b> | <b>S<sub>2</sub></b> | <b>S<sub>3</sub></b> | <b>S<sub>4</sub></b> | <b>T<sub>1</sub></b> | <b>T<sub>2</sub></b> | <b>T<sub>3</sub></b> | <b>T<sub>4</sub></b> | <b>T<sub>5</sub></b> |
| <b>M06-2X</b>        | 3.22                 | 4.65                 | 4.79                 | 5.07                 | 2.71                 | 3.48                 | 3.97                 | 4.13                 | 4.32                 |
| <b>PBE0</b>          | 3.20                 | 3.98                 | 4.13                 | 4.67                 | 2.57                 | 3.22                 | 3.51                 | 3.65                 | 3.77                 |
| <b>ωB97XD</b>        | 3.37                 | 4.69                 | 4.84                 | 5.01                 | 2.77                 | 3.41                 | 3.72                 | 3.99                 | 4.21                 |
| <b>CAM-B3LYP</b>     | 3.37                 | 4.63                 | 4.77                 | 5.01                 | 2.74                 | 3.32                 | 3.62                 | 3.91                 | 4.15                 |

**Table S5** Excited states energies calculated with different basis sets using the CAM-B3LYP functional and with different functionals using the 6-31G basis set in toluene at the T<sub>1</sub> equilibrium geometry.

|                      |                      |                      |                      |                      |                      |                      |                      |                      |                      |
|----------------------|----------------------|----------------------|----------------------|----------------------|----------------------|----------------------|----------------------|----------------------|----------------------|
|                      | <b>S<sub>1</sub></b> | <b>S<sub>2</sub></b> | <b>S<sub>3</sub></b> | <b>S<sub>4</sub></b> | <b>T<sub>1</sub></b> | <b>T<sub>2</sub></b> | <b>T<sub>3</sub></b> | <b>T<sub>4</sub></b> | <b>T<sub>5</sub></b> |
| <b>6-31G</b>         | 3.17                 | 4.51                 | 4.61                 | 4.92                 | 2.52                 | 3.06                 | 3.54                 | 3.82                 | 4.03                 |
| <b>6-31G(d)</b>      | 3.17                 | 4.44                 | 4.59                 | 4.89                 | 2.54                 | 3.07                 | 3.49                 | 3.73                 | 3.97                 |
| <b>6-31G(d,p)</b>    | 3.17                 | 4.44                 | 4.59                 | 4.89                 | 2.53                 | 3.07                 | 3.49                 | 3.72                 | 3.97                 |
| <b>6-31+G(d)</b>     | 3.22                 | 4.32                 | 4.46                 | 4.76                 | 2.62                 | 3.11                 | 3.44                 | 3.67                 | 3.89                 |
| <b>6-31+G(d,p)</b>   | 3.21                 | 4.31                 | 4.46                 | 4.76                 | 2.62                 | 3.11                 | 3.44                 | 3.66                 | 3.89                 |
| <b>6-311++G(d,p)</b> | 3.20                 | 4.29                 | 4.44                 | 4.74                 | 2.61                 | 3.10                 | 3.42                 | 3.64                 | 3.88                 |
|                      | <b>S<sub>1</sub></b> | <b>S<sub>2</sub></b> | <b>S<sub>3</sub></b> | <b>S<sub>4</sub></b> | <b>T<sub>1</sub></b> | <b>T<sub>2</sub></b> | <b>T<sub>3</sub></b> | <b>T<sub>4</sub></b> | <b>T<sub>5</sub></b> |
| <b>M06-2X</b>        | 3.04                 | 4.52                 | 4.63                 | 4.97                 | 2.51                 | 3.16                 | 3.83                 | 4.06                 | 4.20                 |
| <b>PBE0</b>          | 3.00                 | 3.89                 | 4.04                 | 4.54                 | 2.36                 | 2.95                 | 3.41                 | 3.51                 | 3.73                 |
| <b>ωB97XD</b>        | 3.16                 | 4.57                 | 4.68                 | 4.92                 | 2.55                 | 3.13                 | 3.63                 | 3.91                 | 4.11                 |
| <b>CAM-B3LYP</b>     | 3.17                 | 4.51                 | 4.61                 | 4.92                 | 2.52                 | 3.06                 | 3.54                 | 3.82                 | 4.03                 |

**Table S6** Excited states energies calculated with different basis sets using the CAM-B3LYP functional and with different functionals using the 6-31G basis set in toluene at the T<sub>2</sub> equilibrium geometry.

|                      | S <sub>1</sub> | S <sub>2</sub> | S <sub>3</sub> | S <sub>4</sub> | T <sub>1</sub> | T <sub>2</sub> | T <sub>3</sub> | T <sub>4</sub> | T <sub>5</sub> |
|----------------------|----------------|----------------|----------------|----------------|----------------|----------------|----------------|----------------|----------------|
| <b>6-31G</b>         | 3.71           | 4.48           | 4.66           | 5.00           | 3.02           | 3.29           | 3.45           | 3.86           | 4.14           |
| <b>6-31G(d)</b>      | 3.72           | 4.42           | 4.62           | 4.96           | 3.02           | 3.25           | 3.45           | 3.76           | 4.06           |
| <b>6-31G(d,p)</b>    | 3.72           | 4.42           | 4.61           | 4.96           | 3.02           | 3.25           | 3.45           | 3.76           | 4.06           |
| <b>6-31+G(d)</b>     | 3.72           | 4.30           | 4.52           | 4.85           | 3.03           | 3.21           | 3.47           | 3.72           | 4.00           |
| <b>6-31+G(d,p)</b>   | 3.72           | 4.29           | 4.52           | 4.84           | 3.02           | 3.21           | 3.47           | 3.71           | 4.00           |
| <b>6-311++G(d,p)</b> | 3.71           | 4.27           | 4.50           | 4.82           | 3.01           | 3.19           | 3.45           | 3.69           | 3.98           |
|                      | S <sub>1</sub> | S <sub>2</sub> | S <sub>3</sub> | S <sub>4</sub> | T <sub>1</sub> | T <sub>2</sub> | T <sub>3</sub> | T <sub>4</sub> | T <sub>5</sub> |
| <b>M06-2X</b>        | 3.58           | 4.50           | 4.69           | 5.06           | 3.07           | 3.50           | 3.62           | 4.15           | 4.30           |
| <b>PBE0</b>          | 3.49           | 3.96           | 4.09           | 4.72           | 2.86           | 3.21           | 3.29           | 3.67           | 3.78           |
| <b>ωB97XD</b>        | 3.71           | 4.55           | 4.71           | 5.00           | 3.08           | 3.37           | 3.51           | 3.95           | 4.19           |
| <b>CAM-B3LYP</b>     | 3.71           | 4.48           | 4.66           | 5.00           | 3.02           | 3.29           | 3.45           | 3.86           | 4.14           |

**Table S7** Excited states energies calculated with different basis sets using the CAM-B3LYP functional and with different functionals using the 6-31G basis set in toluene at the T<sub>3</sub> equilibrium geometry.

|                      | S <sub>1</sub> | S <sub>2</sub> | S <sub>3</sub> | S <sub>4</sub> | T <sub>1</sub> | T <sub>2</sub> | T <sub>3</sub> | T <sub>4</sub> | T <sub>5</sub> |
|----------------------|----------------|----------------|----------------|----------------|----------------|----------------|----------------|----------------|----------------|
| <b>6-31G</b>         | 2.84           | 4.26           | 4.32           | 4.70           | 2.22           | 2.52           | 3.32           | 3.70           | 3.85           |
| <b>6-31G(d)</b>      | 2.83           | 4.20           | 4.29           | 4.67           | 2.22           | 2.52           | 3.27           | 3.61           | 3.79           |
| <b>6-31G(d,p)</b>    | 2.83           | 4.20           | 4.29           | 4.67           | 2.22           | 2.52           | 3.27           | 3.61           | 3.79           |
| <b>6-31+G(d)</b>     | 2.89           | 4.06           | 4.15           | 4.50           | 2.33           | 2.60           | 3.20           | 3.51           | 3.75           |
| <b>6-31+G(d,p)</b>   | 2.89           | 4.06           | 4.15           | 4.49           | 2.33           | 2.60           | 3.20           | 3.51           | 3.75           |
| <b>6-311++G(d,p)</b> | 2.88           | 4.04           | 4.14           | 4.47           | 2.31           | 2.59           | 3.18           | 3.49           | 3.73           |
|                      | S <sub>1</sub> | S <sub>2</sub> | S <sub>3</sub> | S <sub>4</sub> | T <sub>1</sub> | T <sub>2</sub> | T <sub>3</sub> | T <sub>4</sub> | T <sub>5</sub> |
| <b>M06-2X</b>        | 2.75           | 4.26           | 4.32           | 4.72           | 2.24           | 2.55           | 3.53           | 3.83           | 4.11           |
| <b>PBE0</b>          | 2.67           | 3.69           | 3.81           | 4.29           | 2.06           | 2.40           | 3.17           | 3.26           | 3.69           |
| <b>ωB97XD</b>        | 2.83           | 4.33           | 4.39           | 4.72           | 2.26           | 2.58           | 3.39           | 3.79           | 3.94           |
| <b>CAM-B3LYP</b>     | 2.84           | 4.26           | 4.32           | 4.70           | 2.22           | 2.52           | 3.32           | 3.70           | 3.85           |

**Table S8** Topological  $\Phi_s$  index of the S<sub>1</sub>, T<sub>1</sub>, T<sub>2</sub>, and T<sub>3</sub> states obtained from the S<sub>0</sub> equilibrium geometries with different functionals using the 6-31G basis set.

| Functional      | S <sub>1</sub> | T <sub>1</sub> | T <sub>2</sub> | T <sub>3</sub> |
|-----------------|----------------|----------------|----------------|----------------|
| <b>M062X</b>    | 0.45           | 0.48           | 0.95           | 0.88           |
| <b>PBE0</b>     | 0.47           | 0.61           | 0.92           | 0.76           |
| <b>ωB97XD</b>   | 0.45           | 0.57           | 0.93           | 0.90           |
| <b>CAMB3LYP</b> | 0.45           | 0.65           | 0.91           | 0.89           |

**Table S9** Difference transition matrix obtained from the SH trajectories.

|                      | S <sub>0</sub> | S <sub>1</sub> | T <sub>1</sub> | T <sub>2</sub> | T <sub>3</sub> | T <sub>4</sub> |
|----------------------|----------------|----------------|----------------|----------------|----------------|----------------|
| <b>S<sub>0</sub></b> | 0              | 0              | 0              | 0              | 0              | 0              |
| <b>S<sub>1</sub></b> | 0              | 0              | 0              | -18            | -10            | -2             |

|       |   |    |     |     |     |    |
|-------|---|----|-----|-----|-----|----|
| $T_1$ | 0 | 0  | 0   | 46  | -25 | -5 |
| $T_2$ | 0 | 18 | -46 | 0   | 38  | -4 |
| $T_3$ | 0 | 10 | 25  | -38 | 0   | 6  |
| $T_4$ | 0 | 2  | 5   | 4   | -6  | 0  |

### **S<sub>0</sub> Equilibrium Geometry**

|   |           |           |           |
|---|-----------|-----------|-----------|
| H | 4.378600  | 1.763800  | -1.285100 |
| C | 4.477300  | 0.935700  | -0.590200 |
| C | 4.682100  | -1.161500 | 1.237800  |
| C | 3.322600  | 0.411300  | 0.001300  |
| C | 5.723900  | 0.397900  | -0.288100 |
| C | 5.827000  | -0.650900 | 0.627700  |
| C | 3.429900  | -0.639100 | 0.919400  |
| H | 6.615500  | 0.797800  | -0.760100 |
| H | 6.800500  | -1.066200 | 0.869200  |
| H | 2.540300  | -1.032300 | 1.402400  |
| H | 4.763000  | -1.965800 | 1.961800  |
| C | 2.009200  | 1.056100  | -0.322500 |
| O | 1.963800  | 2.248800  | -0.579800 |
| C | 0.757400  | 0.237100  | -0.324600 |
| C | -1.582700 | -1.201900 | -0.417900 |
| C | -0.446100 | 0.894800  | -0.055300 |
| C | 0.768700  | -1.133300 | -0.652100 |
| C | -0.406200 | -1.875500 | -0.712700 |
| C | -1.629300 | 0.163900  | -0.090000 |
| H | -0.433600 | 1.955700  | 0.174000  |
| H | 1.710400  | -1.618000 | -0.887800 |
| H | -0.409800 | -2.925900 | -0.979300 |
| O | -2.826300 | -1.763400 | -0.412100 |
| C | -3.035600 | 0.455200  | 0.136400  |
| C | -3.701700 | -0.759000 | -0.076800 |
| C | -3.774300 | 1.587900  | 0.486900  |
| H | -3.283200 | 2.540800  | 0.656500  |
| C | -5.154300 | 1.463200  | 0.611400  |
| H | -5.748600 | 2.329300  | 0.882300  |
| C | -5.793800 | 0.232400  | 0.391400  |
| H | -6.871800 | 0.166900  | 0.495900  |
| C | -5.075100 | -0.908400 | 0.040800  |
| H | -5.555100 | -1.864700 | -0.132600 |

**S<sub>1</sub> Equilibrium Geometry**

|   |           |           |           |
|---|-----------|-----------|-----------|
| H | 4.409100  | 1.959600  | -1.044200 |
| C | 4.500500  | 1.072500  | -0.425800 |
| C | 4.734300  | -1.222500 | 1.140400  |
| C | 3.337400  | 0.384900  | -0.019700 |
| C | 5.755900  | 0.606800  | -0.052900 |
| C | 5.883800  | -0.544500 | 0.724600  |
| C | 3.472200  | -0.766700 | 0.783600  |
| H | 6.641400  | 1.145300  | -0.376500 |
| H | 6.865600  | -0.907000 | 1.010300  |
| H | 2.589000  | -1.282200 | 1.145800  |
| H | 4.821600  | -2.109000 | 1.761200  |
| C | 2.030700  | 0.893800  | -0.398700 |
| O | 1.927100  | 2.110500  | -0.837400 |
| C | 0.751200  | 0.157500  | -0.381500 |
| C | -1.632300 | -1.223100 | -0.416000 |
| C | -0.434700 | 0.848600  | -0.087800 |
| C | 0.714900  | -1.214500 | -0.729100 |
| C | -0.475800 | -1.926700 | -0.732400 |
| C | -1.637000 | 0.143900  | -0.104900 |
| H | -0.403400 | 1.902100  | 0.169400  |
| H | 1.636300  | -1.714100 | -1.008400 |
| H | -0.509100 | -2.979700 | -0.987600 |
| O | -2.889400 | -1.756200 | -0.374700 |
| C | -3.030000 | 0.473100  | 0.148100  |
| C | -3.731000 | -0.727300 | -0.034600 |
| C | -3.732700 | 1.628600  | 0.499400  |
| H | -3.215100 | 2.571200  | 0.645800  |
| C | -5.112200 | 1.540600  | 0.655400  |
| H | -5.678400 | 2.424900  | 0.927700  |
| C | -5.787100 | 0.323500  | 0.465800  |
| H | -6.863800 | 0.286700  | 0.594700  |
| C | -5.105200 | -0.839400 | 0.115000  |
| H | -5.613000 | -1.785300 | -0.035100 |

**T<sub>1</sub> Equilibrium Geometry**

|   |           |           |           |
|---|-----------|-----------|-----------|
| H | 4.311700  | 1.994500  | -1.068600 |
| C | 4.462900  | 1.101900  | -0.469700 |
| C | 4.849700  | -1.217300 | 1.032400  |
| C | 3.339300  | 0.371300  | -0.015400 |
| C | 5.748900  | 0.666300  | -0.179700 |
| C | 5.954200  | -0.497800 | 0.564100  |
| C | 3.558200  | -0.789700 | 0.762200  |
| H | 6.599000  | 1.234600  | -0.544100 |
| H | 6.960900  | -0.837300 | 0.783800  |
| H | 2.712200  | -1.331600 | 1.171900  |
| H | 4.999300  | -2.111800 | 1.629100  |
| C | 2.011700  | 0.850400  | -0.296800 |
| O | 1.902000  | 2.140000  | -0.619800 |
| C | 0.752000  | 0.130800  | -0.288800 |
| C | -1.644200 | -1.244600 | -0.356100 |
| C | -0.446600 | 0.830200  | -0.043600 |
| C | 0.711100  | -1.254900 | -0.599500 |
| C | -0.481400 | -1.960000 | -0.622000 |
| C | -1.649400 | 0.129900  | -0.079500 |
| H | -0.421500 | 1.888800  | 0.193900  |
| H | 1.634400  | -1.766700 | -0.848200 |
| H | -0.513200 | -3.017900 | -0.856400 |
| O | -2.905800 | -1.771000 | -0.338200 |
| C | -3.047700 | 0.471200  | 0.126800  |
| C | -3.750100 | -0.729800 | -0.046400 |
| C | -3.753200 | 1.638100  | 0.430800  |
| H | -3.234200 | 2.581300  | 0.569300  |
| C | -5.137100 | 1.561400  | 0.550400  |
| H | -5.705400 | 2.454900  | 0.785800  |
| C | -5.813400 | 0.343600  | 0.371300  |
| H | -6.893500 | 0.315300  | 0.471100  |
| C | -5.128700 | -0.830900 | 0.067700  |
| H | -5.637600 | -1.777500 | -0.073400 |



## T<sub>2</sub> Equilibrium Geometry

|   |           |           |           |
|---|-----------|-----------|-----------|
| H | 4.303400  | 2.161500  | -0.708400 |
| C | 4.469400  | 1.188200  | -0.265300 |
| C | 4.735900  | -1.335800 | 0.942700  |
| C | 3.284200  | 0.377500  | -0.032400 |
| C | 5.721600  | 0.704500  | 0.020900  |
| C | 5.885500  | -0.563900 | 0.615400  |
| C | 3.476900  | -0.884600 | 0.651800  |
| H | 6.597100  | 1.306000  | -0.204500 |
| H | 6.875700  | -0.942700 | 0.843000  |
| H | 2.618100  | -1.471900 | 0.959300  |
| H | 4.863000  | -2.290900 | 1.443400  |
| C | 2.017300  | 0.984000  | -0.374500 |
| O | 1.895500  | 2.169700  | -0.678400 |
| C | 0.785300  | 0.148400  | -0.339100 |
| C | -1.615600 | -1.235800 | -0.363500 |
| C | -0.451600 | 0.871300  | -0.150500 |
| C | 0.731800  | -1.260500 | -0.690000 |
| C | -0.439600 | -1.963200 | -0.675100 |
| C | -1.626900 | 0.167300  | -0.117800 |
| H | -0.373700 | 1.941800  | -0.010800 |
| H | 1.650700  | -1.761100 | -0.974200 |
| H | -0.490900 | -3.020000 | -0.911000 |
| O | -2.841900 | -1.769000 | -0.294900 |
| C | -3.030300 | 0.484300  | 0.117700  |
| C | -3.715300 | -0.729600 | -0.003200 |
| C | -3.748100 | 1.642400  | 0.409600  |
| H | -3.245200 | 2.598500  | 0.509300  |
| C | -5.130500 | 1.537000  | 0.568900  |
| H | -5.710700 | 2.424700  | 0.796100  |
| C | -5.783900 | 0.305200  | 0.440900  |
| H | -6.859700 | 0.256200  | 0.570500  |
| C | -5.080500 | -0.867000 | 0.148300  |
| H | -5.570900 | -1.827800 | 0.044300  |

**T<sub>3</sub> Equilibrium Geometry**

|   |           |           |           |
|---|-----------|-----------|-----------|
| H | 4.256200  | 2.102400  | -0.764000 |
| C | 4.414300  | 1.115100  | -0.342100 |
| C | 4.732100  | -1.384600 | 0.851900  |
| C | 3.287300  | 0.417700  | 0.098200  |
| C | 5.685300  | 0.553000  | -0.227100 |
| C | 5.849300  | -0.698600 | 0.366600  |
| C | 3.463700  | -0.822900 | 0.718500  |
| H | 6.553000  | 1.094800  | -0.593000 |
| H | 6.840800  | -1.129100 | 0.471300  |
| H | 2.603300  | -1.347900 | 1.133700  |
| H | 4.855000  | -2.343300 | 1.346900  |
| C | 1.944700  | 1.124400  | -0.017200 |
| O | 1.821200  | 2.331000  | -0.156700 |
| C | 0.793400  | 0.295500  | -0.210000 |
| C | -1.564800 | -1.253300 | -0.348100 |
| C | -0.487800 | 0.973000  | -0.292300 |
| C | 0.778000  | -1.080700 | -0.687600 |
| C | -0.367100 | -1.892600 | -0.610400 |
| C | -1.647900 | 0.166700  | -0.228600 |
| H | -0.486600 | 2.053900  | -0.280700 |
| H | 1.685800  | -1.496000 | -1.113000 |
| H | -0.321300 | -2.957700 | -0.812200 |
| O | -2.802400 | -1.839700 | -0.211800 |
| C | -3.013400 | 0.439700  | 0.013100  |
| C | -3.671100 | -0.826700 | 0.004000  |
| C | -3.762500 | 1.619500  | 0.229400  |
| H | -3.274200 | 2.587100  | 0.241700  |
| C | -5.119700 | 1.490500  | 0.420100  |
| H | -5.730100 | 2.370000  | 0.587500  |
| C | -5.743500 | 0.214400  | 0.401200  |
| H | -6.816200 | 0.158100  | 0.553400  |
| C | -5.036800 | -0.964700 | 0.193600  |
| H | -5.517100 | -1.935000 | 0.176700  |
